# Supplementary material for: YBaCuO-type perovskites as potential air electrodes for SOFCs. The case of YSr2Cu2FeO7+δ
Source: Royal Society of Chemistry journal article supplement (doi:10.1039/d1ta00111f), 2021-01-01

**YBaCuO-type perovskites as potential air electrodes for SOFCs. The case of  $\text{YSr}_2\text{Cu}_2\text{FeO}_{7+\delta}$**

Sara A. López-Paz,<sup>a</sup> Rafael Marín-Gamero,<sup>a</sup> Xabier Martínez de Irujo-Labelde,<sup>a</sup> Jorge Sánchez-Marcos,<sup>b</sup> Domingo Perez-Coll,<sup>c</sup> Miguel Ángel Alario y Franco<sup>a</sup>, Susana García-Martín<sup>a\*</sup>

<sup>a</sup> Departamento de Química Inorgánica, Facultad de Ciencias Químicas, Universidad Complutense, 28040 Madrid, Spain

<sup>b</sup> Departamento de Química Física Aplicada, Universidad Autónoma de Madrid, 28049 Madrid, Spain

<sup>c</sup> Instituto de Cerámica y Vidrio, CSIS, Cantoblanco, 28049 Madrid, Spain

e-mail: [sgmartin@ucm.es](mailto:sgmartin@ucm.es)

**Figure 1 SI.** Rietveld refinement of the room temperature PXRD pattern of the  $\text{YSr}_2\text{Cu}_2\text{FeO}_{7.56}$  oxide prepared at air within the  $P4/mmm$  space group. Oxygen content and cation location are determined from the experiments indicated in the article. **Table 1SI** collects the refined atomic parameters and agreement factors.

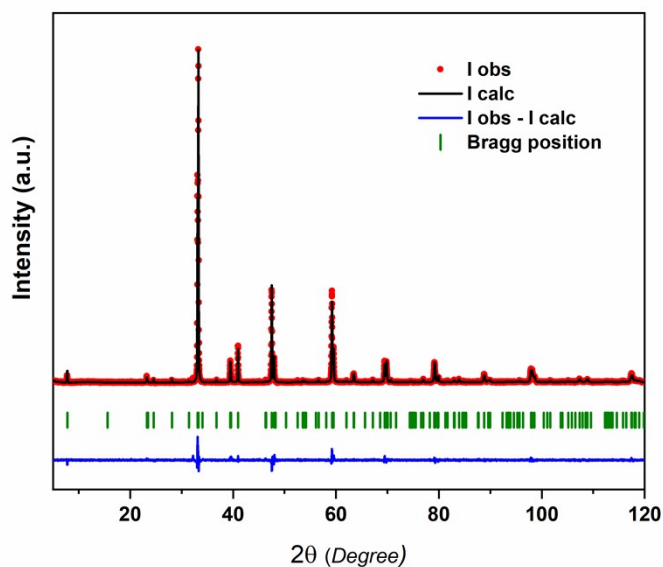

**Table 1 SI.** Refined cell and atomic parameters as obtained from Rietveld refinement of the room temperature PXRD pattern of the  $\text{YSr}_2\text{Cu}_2\text{FeO}_{7.56}$  oxide prepared at air within the  $P4/mmm$  space group.

| Atom    | Site | $x/a$    | $y/b$ | $z/c$     | $B_{\text{iso}} (\text{Å}^2)$ | Occupancy              |
|---------|------|----------|-------|-----------|-------------------------------|------------------------|
| Fe1/Cu1 | 1a   | 0        | 0     | 0         | 1.3(1)                        | 0.66/0.34 <sup>a</sup> |
| Cu2/Fe2 | 2g   | 0        | 0     | 0.3482(3) | 0.14(7)                       | 0.83/0.17 <sup>a</sup> |
| Sr      | 2h   | 0.5      | 0.5   | 0.1816(2) | 0.91(7)                       | 1                      |
| Y       | 1d   | 0.5      | 0.5   | 0.5       | 0.37(9)                       | 1                      |
| O1      | 2g   | 0        | 0     | 0.148(1)  | 1.5(6)                        | 1                      |
| O2      | 4i   | 0        | 0.5   | 0.3700(6) | 0.64(7)                       | 1                      |
| O3      | 4n   | 0.086(1) | 0.5   | 0         | 1.8(6)                        | 0.392 <sup>b</sup>     |

Space group  $P4/mmm$  (No. 123);  $a = 3.82412 (5) \text{ Å}$ ,  $c = 11.3716 (2) \text{ Å}$ ,  $V = 166.297 (4) \text{ Å}^3$ .  
 $R_p = 3.92 \%$ ;  $R_{wp} = 5.30 \%$ ;  $\chi^2 = 2.44$ ;  $R_{\text{Bragg}} = 4.45 \%$

<sup>a</sup> Occupancy fixed to the values obtained from Mössbauer spectroscopy

<sup>b</sup> Occupancy fixed to the value obtained from TGA

**Figure 2 SI.** Normalized Fe K-edge XAS spectra for the  $\text{YSr}_2\text{Cu}_2\text{FeO}_{7+\delta}$  oxide prepared at air (in blue), together with  $\text{Sr}_2\text{Fe}^{3+}_2\text{O}_5$  (in black) and  $\text{SrFe}^{4+}\text{O}_3$  (in red) oxides measured as a reference.

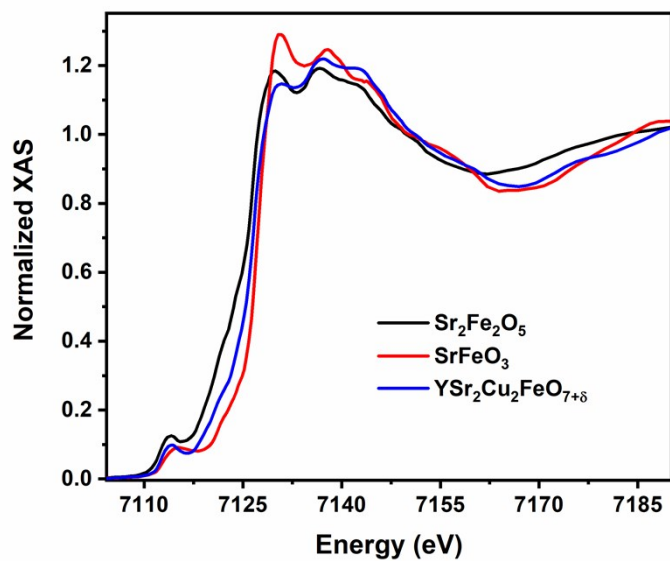

**Figure 3 SI.** Crystal structure of the (a)  $\text{YSr}_2\text{Cu}_2\text{FeO}_{7.08}$  (29) and  $\text{YSr}_2\text{Cu}_2\text{FeO}_{7.85}$  (25) compounds synthesized in  $\text{N}_2$  and  $\text{O}_3$  atmosphere, respectively. The Fe-coordination environment at the charge reservoir layers changes from tetrahedral  $[\text{Fe}^{3+}\text{O}_4]$  to octahedral  $[\text{Fe}^{4+}\text{O}_6]$  with increasing the oxygen content.

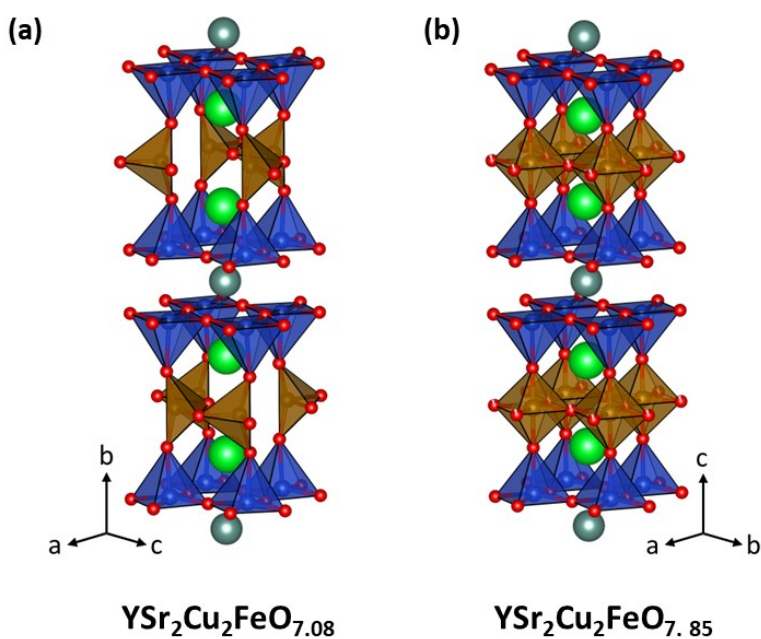

Fig. 4 SI. Thermogravimetric analysis (TGA) at air of the  $\text{YSr}_2\text{Cu}_2\text{FeO}_{7.56}$  oxide.

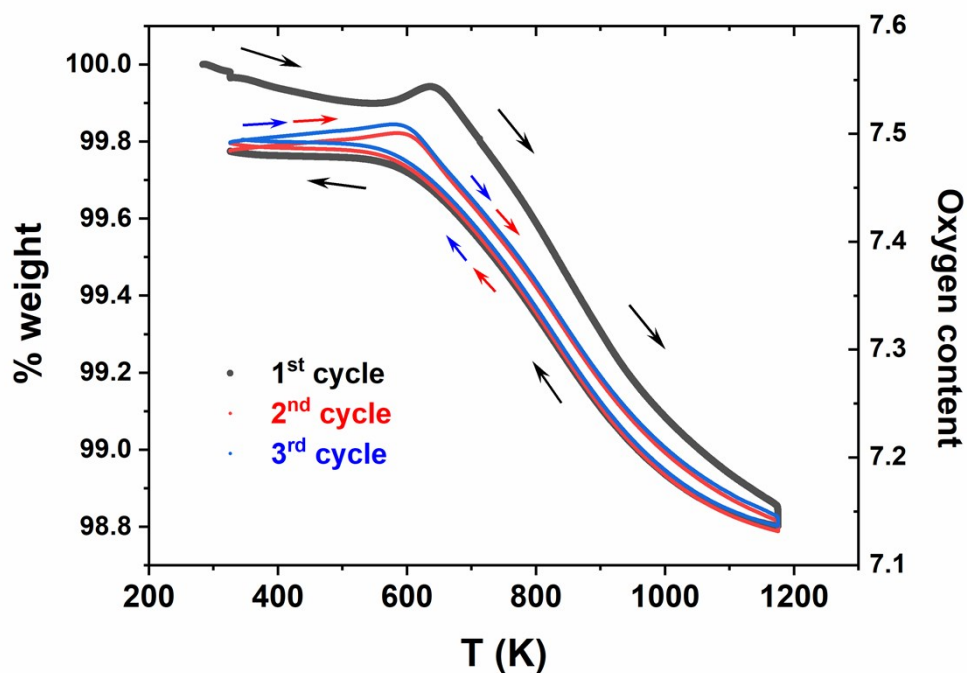

Fig. 5 SI. LeBail fitting of the PXRD pattern for the  $\text{YSr}_2\text{Cu}_2\text{FeO}_{7.56}$  oxide (P4/mmm space group) before (upper panel;  $R_p = 2.41$ ,  $R_{wp} = 5.11$ ,  $R_{Bragg} = 2.88$ ) and after (lower panel;  $R_p = 2.47$ ,  $R_{wp} = 5.06$ ,  $R_{Bragg} = 2.81$ ) thermogravimetric analysis (TGA) at air.

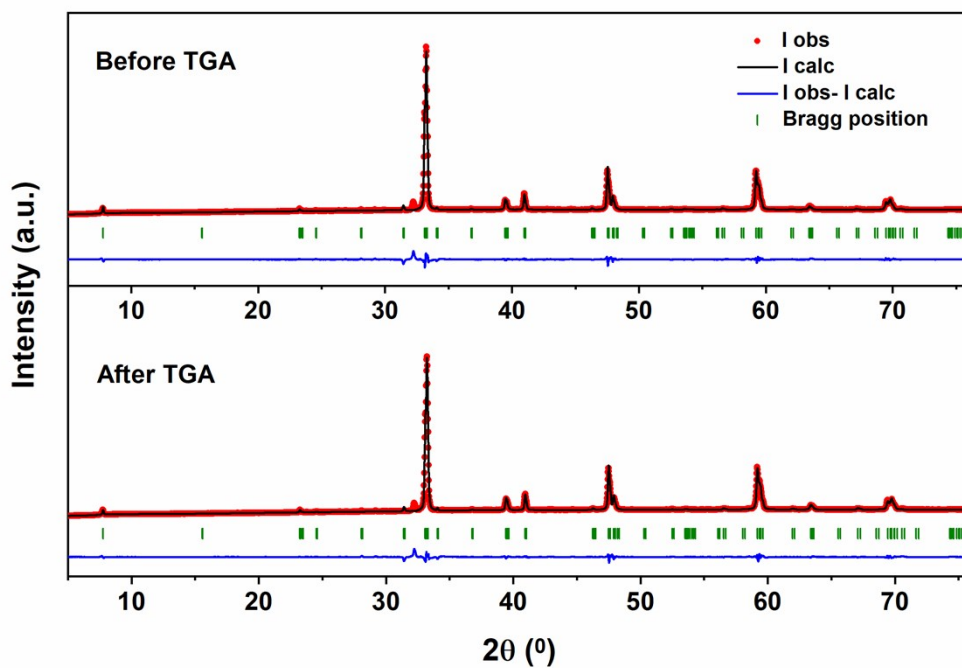

**Fig. 6 SI.** The PXRD pattern of the mixture of  $\text{YSr}_2\text{Cu}_2\text{FeO}_{7.56}$  with CGO (70:30 wt%) heated in air at 1173 K for 48 hours. PXRD patterns of  $\text{YSr}_2\text{Cu}_2\text{FeO}_{7.56}$  and CGO are also shown for reference.

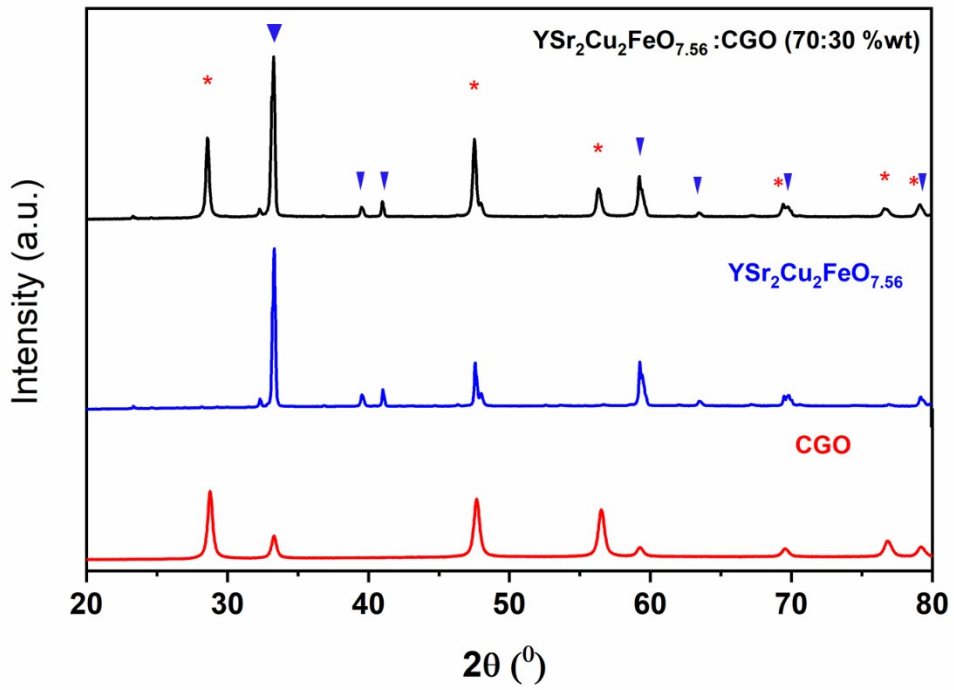

**Fig. 7 SI.** Unit cell volume values of  $\text{YSr}_2\text{Cu}_2\text{FeO}_{7+\delta}$  at different temperatures. Thermal expansion coefficients are calculated using linear-fit parameters in two ranges, below and above 673 K.

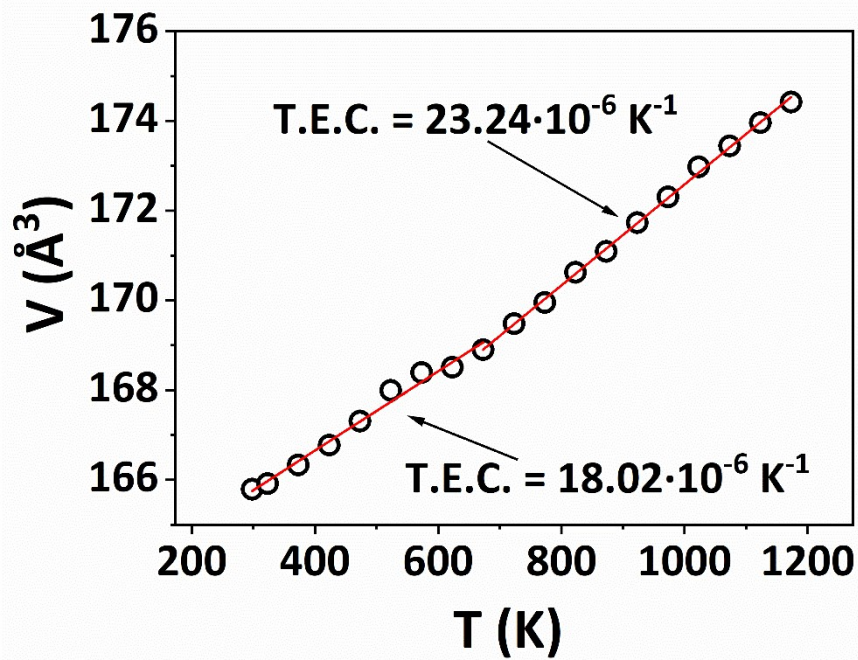

Supplement: d1ta00111f1.pdf [file d1ta00111f1.pdf]
